# Supplementary material
Source: PubMed Central journal article supplement (PMC2781691)
Supplement: supp_M109.047910_jbc.M109.047910-1.pdf [file supp_M109.047910_jbc.M109.047910-1.pdf]

# Supplemental Figure 1

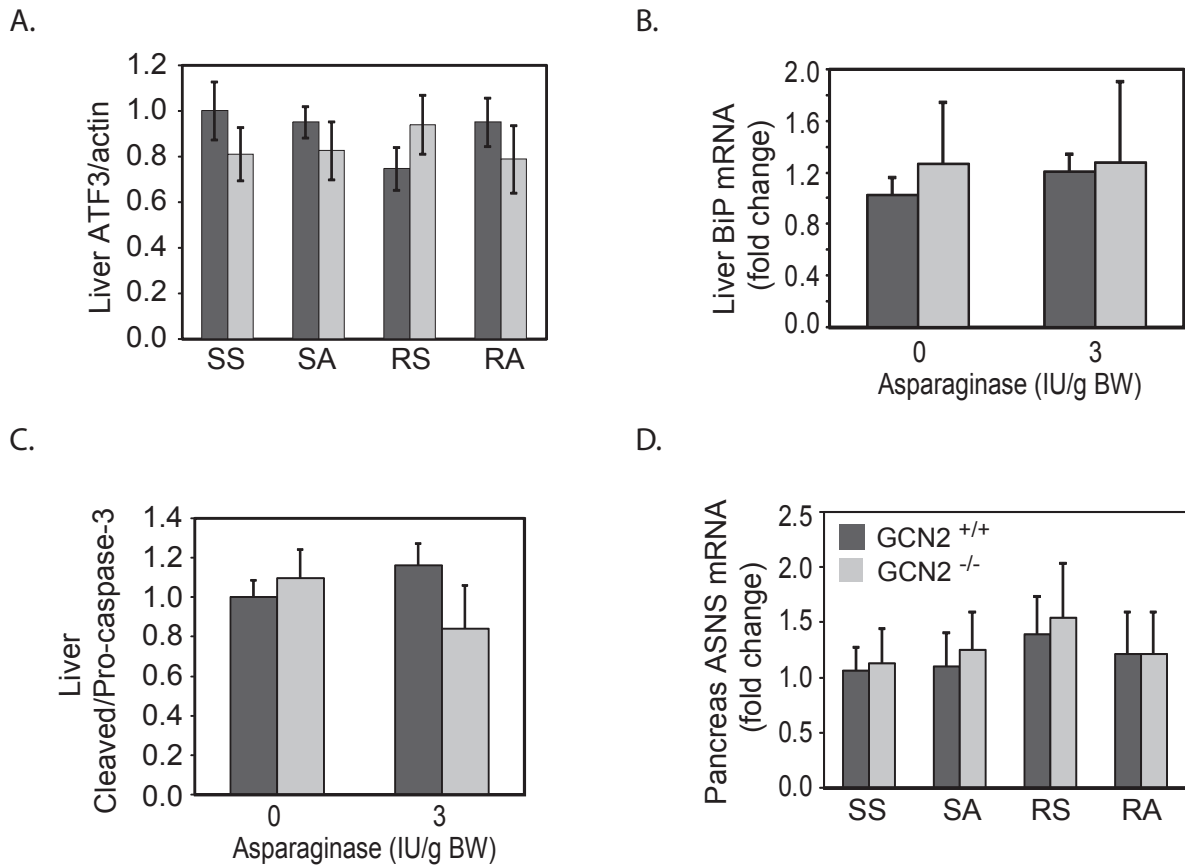

Figure S1. Neither asparaginase nor rapamycin altered hepatic expression of (A) ATF3, (B) BiP/Grp78 and (C) caspase-3 cleavage. (D) ASNS mRNA expression in pancreas was also not changed by either drug or genotype. Dark bars= wildtype GCN2<sup>+/+</sup> mice; light bars=GCN2<sup>-/-</sup> null mice.
