# Supplementary material
Source: PubMed Central journal article supplement (PMC2781691)
Supplement: supp_M109.047910_jbc.M109.047910-2.pdf [file supp_M109.047910_jbc.M109.047910-2.pdf]

## Supplemental Figure 2

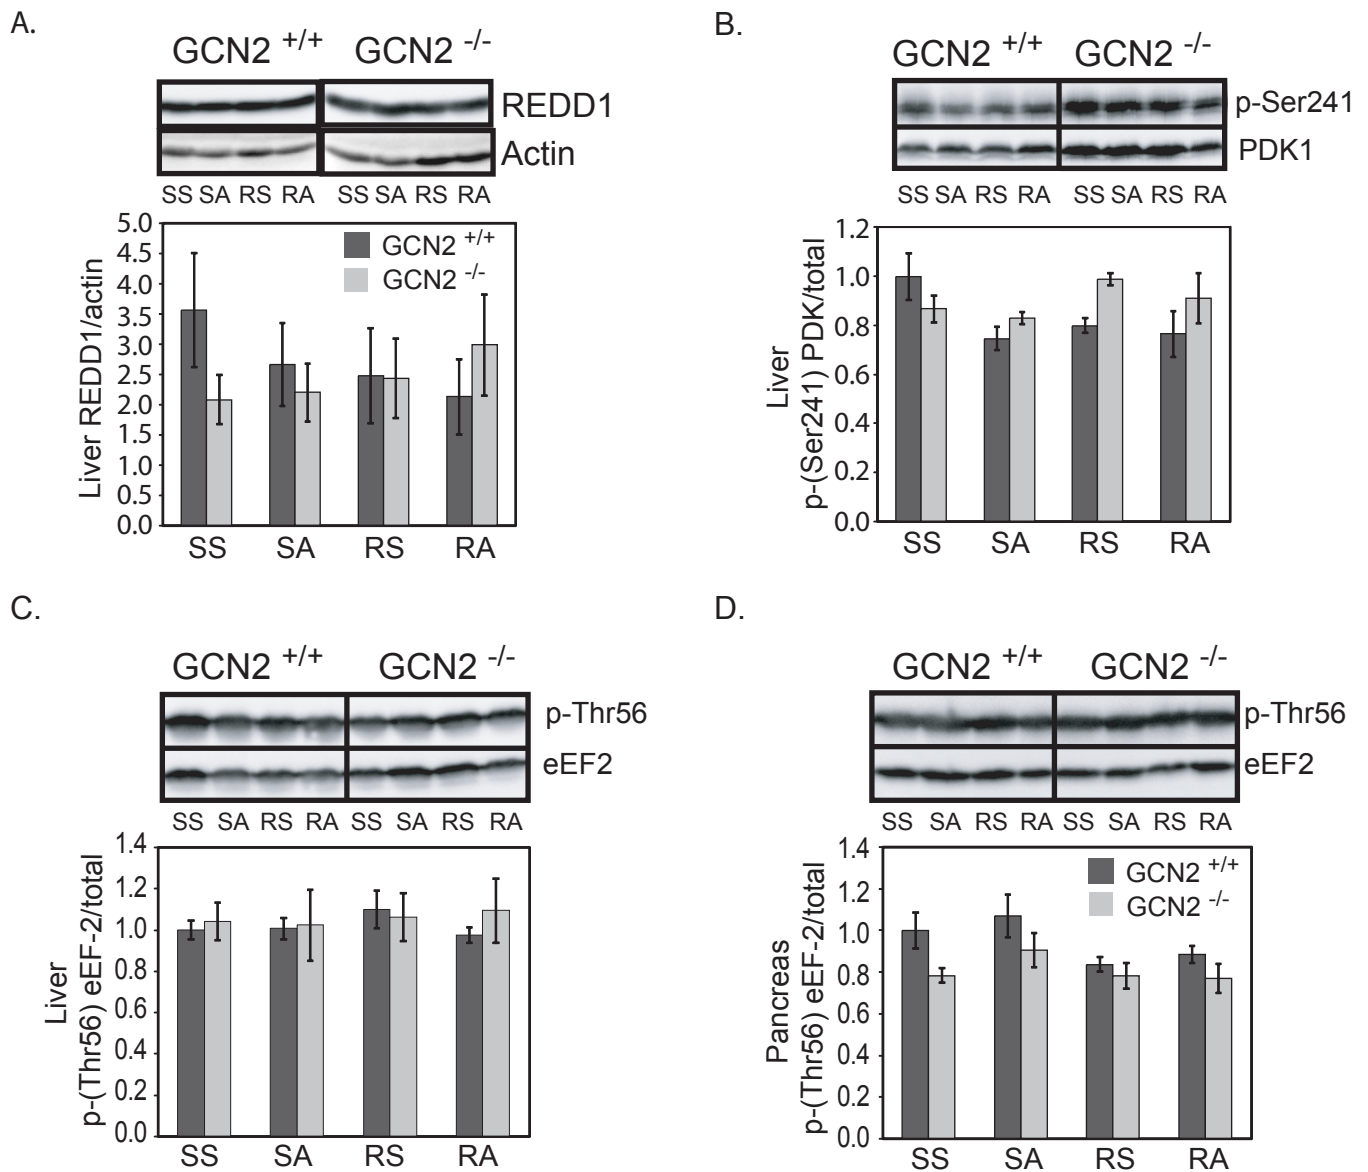

Figure S2. Neither asparaginase, rapamycin or genotype altered hepatic expression of (A) REDD1 nor phosphorylation of (B) PDK1(Ser241) (C) eEF-2(Thr56). In addition, no changes in the phosphorylation of eEF-2(Thr56) (D) were noted in pancreas. Dark bars=wildtype GCN2<sup>+/+</sup> mice; light bars= GCN2<sup>-/-</sup> null mice.
